# Supplementary material for: Wissenschaftliche Leistungen augenheilkundlicher Forschungseinrichtungen in Deutschland 2018 bis 2020
Source: Springer Nature journal article supplement (doi:10.1007/s00347-022-01653-z), 2022-05-23
Supplement: MOESM1 [file 22765844]

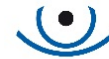

## Umfrage 2021 für die Jahre 2018, 2019 und 2020

---

**Ihre Klinik:**

### 1. Klinisch-Ophthalmologisches Studienzentrum

- a. Verfügt Ihre Einrichtung über ein klinisch-ophthalmologisches Studienzentrum mit exklusiv hierfür tätigen, angestellten Mitarbeitern?

Ja

Nein

Bemerkung:

- b.\* Falls ja, wie viele Studien, die bei einer Ethikkommission sowie bei einem Studienregister (DIMDI, DRKS, NCT, EUDRACT, ICTRP, EU Clinical Trials Register, Datenbank Klinische Prüfungen bei PharmNet.Bund oder anderen) angemeldet sind, wurden im Zeitraum 2018-2020 durchgeführt (Wertung nur bei Vorliegen einer Bestätigung)?

Anzahl:

Themenschwerpunkte (max. 10 Worte pro Zeile):

1.

2.

3.

### 2. Experimentelle Ophthalmologie

- a. Verfügt Ihre Einrichtung über einen ophthalmologisch-experimentellen wissenschaftlichen Bereich mit exklusiv hierfür tätigen, angestellten Mitarbeitern?

Ja

Nein

Bemerkung:

- b. Falls ja, welche wichtigsten Themenschwerpunkte werden hier derzeit bearbeitet (max. 10 Worte pro Zeile)?

1.

2.

3.

### 3. Forschungsschwerpunkte

Welche Forschungsschwerpunkte planen / sehen Sie an Ihrer Einrichtung in den nächsten 5 Jahren (max. 3 Nennungen, max. 10 Worte pro Zeile)?

1.

2.

3.

Bitte beachten Sie:

Ihre Antworten können nur dann in der Erhebung der DOG berücksichtigt werden, wenn sie bis spätestens **31.05.2021** vollständig beantwortet vorliegen.

## Umfrage 2021 für die Jahre 2018, 2019 und 2020

### 4. Forschungsförderungen\*

Wie viele Ihrer Anträge aus den Jahren 2018-2020 bei der DFG, dem BMBF, der EU und bei Stiftungen wurden bewilligt (Berücksichtigung nur bei Vorliegen einer Kopie der jeweiligen Bewilligung)? Bitte geben Sie nur die Zahl der Anträge an, nicht die Höhe der Förderungen. Diese berechnen wir aus den eingereichten Bewilligungen.

|      | DFG, BMBF oder EU | Stiftungen |
|------|-------------------|------------|
| 2018 |                   |            |
| 2019 |                   |            |
| 2020 |                   |            |

### 5. Publikationen\*

Wie viele wissenschaftliche Arbeiten aus Ihrer Einrichtung wurden in den Jahren 2018, 2019 und 2020 in bei Pub-Med gelisteten Medien publiziert (alle Arbeiten aus Ihrem Standort)? **Ausreichend ist eine Evaluna-Liste der Jahre 2018/2019/2020 für Ihr Haus oder eine validierte Liste Ihres Dekanats.** Falls eine solche Liste nicht verfügbar ist, benötigen wir eine Excel-Liste mit den folgenden Daten: Pubmed-ID (PMID), Autor(en), Titel der Publikation, Erscheinungsjahr, Journal

Anzahl 2018:

Anzahl 2019:

Anzahl 2020:

### 6. Habilitation/Promotionen

Wie viele Habilitationen / Promotionen wurden in 2018, 2019 und 2020 in Ihrem Haus abgeschlossen.

#### Habilitationen

2018:

2019:

2020:

#### Promotionen

2018:

2019:

2020:

Bitte beachten Sie:

Ihre Antworten können nur dann in der Erhebung der DOG berücksichtigt werden, wenn sie bis spätestens **31.05.2021** vollständig beantwortet vorliegen.

## Umfrage 2021 für die Jahre 2018, 2019 und 2020

---

### 7. Anzahl der W-Professuren (W2/C3 und W3/C4) in Ihrer Einrichtung

Wie viele W-Professuren gab es in Ihrem Haus in den Jahren 2018, 2019 und 2020?

#### **W2/C3**

2018:

2019:

2020:

#### **W3/C4**

2018:

2019:

2020:

### 8. Internationale Gastwissenschaftler an Ihrer Einrichtung (DAAD, CSC, AvH etc.):

Wie viele internationale Gastwissenschaftler waren in 2018, 2019 und 2020 an Ihrer Einrichtung tätig?

2018:

2019:

2020:

### 9. Erhaltene Patente\*

Wie viele Patente hat ihr Haus in 2018, 2019 und 2020 erhalten?

2018:

2019:

2020:

### 10. Anzahl der Beteiligungen/Leitung an/von Gruppenförderinstrumenten\*

An welchen Gruppenförderinstrumenten (DFG [FOR, GRK, SFB, TR]/BMBF [Exzellenzcluster]/EU [Horizon 2020, Horizon Europe, COST etc.]) waren Sie 2018, 2019 und 2020 beteiligt bzw. hatten Sie die Leitung.

#### **Leitung**

2018:

2019:

2020:

#### **Beteiligt**

2018:

2019:

2020:

\*Bitte fügen Sie folgende Unterlagen bei, damit die entsprechenden Angaben gewertet werden können:

- Frage 1b: Liste der Studiennummern
- Frage 4: Kopien der Bewilligungen der Forschungsförderungen
- Frage 5: Publikationsliste
- Frage 9: Bestätigungsschreiben Patente
- Frage 10: Beteiligungen/Leitung an/von Gruppenförderinstrumenten

Ihre Antworten können nur dann in der Erhebung der DOG berücksichtigt werden, wenn sie bis **spätestens 31.05.2021** vollständig beantwortet vorliegen.
