# Supplementary material for: Wissenschaftliche Leistungen augenheilkundlicher Forschungseinrichtungen in Deutschland 2018 bis 2020
Source: Springer Nature journal article supplement (doi:10.1007/s00347-022-01653-z), 2022-05-23
Supplement: MOESM2 [file 22765844]

**Universitätsaugenkliniken:**

1. Klinik für Augenheilkunde, Uniklinik RWTH Aachen
2. Universitätsklinikum Augsburg, Augenklinik, Augsburg
3. Augenklinik Charité - Universitätsmedizin Berlin - Campus Virchowklinikum und Campus Benjamin Franklin
4. Universitäts-Augenklinik, Ruhr-Universität Bochum
5. Universitäts-Augenklinik Bonn
6. Universitätsklinikum Carl Gustav Carus, Klinik und Poliklinik für Augenheilkunde Dresden
7. Klinik für Augenheilkunde, Universitätsklinikum Düsseldorf
8. Universitätsklinikum Erlangen, Augenklinik, Friedrich-Alexander-Universität Erlangen-Nürnberg
9. Klinik für Augenheilkunde, Klinikum der J.W. Goethe-Universität Frankfurt/Main
10. Klinik für Augenheilkunde, Medizinische Fakultät, Universitätsklinikum Freiburg
11. Justus-Liebig-Universität, Fachbereich Medizin, Klinik und Poliklinik für Augenheilkunde, Universitätsklinikum Gießen und Marburg GmbH, Standort Gießen
12. Augenklinik der Universitätsmedizin Göttingen
13. Klinik und Poliklinik für Augenheilkunde, Universitätsmedizin Greifswald
14. Klinik und Poliklinik für Augenheilkunde, Universitätsklinikum Halle, Martin-Luther-Universität Halle-Wittenberg
15. Klinik und Poliklinik für Augenheilkunde, Universitätsklinikum Hamburg-Eppendorf
16. Universitätsklinik für Augenheilkunde, Medizinische Hochschule Hannover
17. Universitäts-Augenklinik, Ruprecht-Karls-Universität Heidelberg
18. Universitätsklinikum des Saarlandes, Klinik für Augenheilkunde, Homburg/Saar
19. Klinik für Augenheilkunde, Universitätsklinikum Jena
20. Klinik für Ophthalmologie, Universitätsklinikum Schleswig-Holstein, Campus Kiel
21. Zentrum für Augenheilkunde, Medizinische Fakultät und Uniklinik Köln, Universität zu Köln
22. Klinik und Poliklinik für Augenheilkunde, Universitätsklinikum Leipzig
23. Klinik für Augenheilkunde, Universitätsklinikum Schleswig-Holstein, Campus Lübeck
24. Klinik für Augenheilkunde, Universität Magdeburg
25. Augenklinik und Poliklinik der Universitätsmedizin Mainz
26. Universitätsklinikum Marburg, Klinik für Augenheilkunde am Standort Marburg
27. Ludwig-Maximilians-Universität, Universitäts-Augenklinik München
28. Klinik und Poliklinik für Augenheilkunde, Klinikum rechts der Isar der Technischen Universität München
29. Universitätsklinikum Münster, Klinik für Augenheilkunde, Münster
30. Universitätsklinik für Augenheilkunde, Fakultät VI Medizin und Gesundheitswissenschaften, Carl von Ossietzky Universität Oldenburg
31. Universitätsklinikum Regensburg, Klinik und Poliklinik für Augenheilkunde, Regensburg
32. Klinik und Poliklinik für Augenheilkunde, Universitätsmedizin Rostock
33. Universitätsklinikum Tübingen, Universitäts-Augenklinik, Eberhard Karls Universität Tübingen
34. Klinik für Augenheilkunde, Universitätsklinikum Ulm
35. Universitätsklinikum Würzburg, Klinik und Poliklinik für Augenheilkunde, Würzburg

**Andere Kliniken:**

1. Augenklinik am Wittenbergplatz, Berlin
2. Augenklinik des Klinikums Ludwigshafen am Rhein
3. Augenzentrum an St. Franziskus-Hospital, Münster
4. Augenklinik Sulzbach, Knappschaftsklinikum Saar

**Ambulante Forschungseinrichtungen:**

1. Zentrum für seltene Netzhauterkrankungen (ZsNE), AugenZentrum Siegburg, MVZ Augen­ärztliches Diagnostik- und Therapiecentrum Siegburg GmbH
2. Universitätsklinikum Tübingen, Forschungsinstitut für Augenheilkunde, Eberhard Karls Universität Tübingen (wurde mit Uniaugenklinik Tübingen zusammen gewertet)
